# Supplementary material for: Concentration and composition of odd-chain fatty acids in phospholipids and triacylglycerols in Chinese human milk throughout lactation
Source: Royal Society of Chemistry journal article supplement (doi:10.1039/d4fo00396a), 2024-01-01
Supplement: d4fo00396a1.pdf [file d4fo00396a1.pdf]

## Concentration and Composition of Odd-Chain Fatty Acids in Phospholipids and Triacylglycerols in Chinese Human Milk throughout Lactation

Xiao-Yan Chen, et al

**Supplemental Table 1** Correlations of PL-OCFA and TAG-OCFA with food groups intake (energy-adjusted)

|                | PL-OCFA   | TAG-OCFA  |
|----------------|-----------|-----------|
| Dairy products | 0.031     | 0.004     |
| Vegetables     | 0.056     | -0.152*   |
| Fruits         | 0.187***  | -0.233*** |
| Cereals        | -0.214*** | 0.023     |
| Meat           | 0.009     | -0.028    |

Values were expressed as correlation coefficient and Pearson's Correlation was performed to analyze the correlation of PL-OCFA and TAG-OCFA with food groups intake, adjusted for total daily energy intake. \* indicated  $p < 0.05$ ; \*\*\* indicated  $p < 0.001$ . Abbreviation: PL-OCFA, odd chain fatty acid-containing phospholipids; TAG-OCFA, odd chain fatty acid-containing triacylglycerols.

**Supplemental Table 2** List of OCFA-containing phospholipid identified in human milk

| Molecular species | Fatty acyl group<br>( <i>sn1/sn2</i> ) | m/z in MS/MS<br>(precursor ion>product ion) |
|-------------------|----------------------------------------|---------------------------------------------|
| PE(33:1)          | 15:0/18:1                              | 704.50>563.50                               |
| PE(P-35:2)        | P-17:0/18:2                            | 714.55>573.55                               |
| PE(P-35:1)        | P-17:0/18:1                            | 716.55>575.55                               |
| PE(35:1)          | 17:0/18:1                              | 732.55>591.55                               |
| PE(37:3)          | 19:0/18:3                              | 756.55>615.55                               |
| PE(37:2)          | 19:0/18:2                              | 758.55>617.55                               |
| PE(37:1)          | 19:0/18:1                              | 760.60>619.60                               |
| PE(39:5)          | 19:0/20:5                              | 780.55>639.55                               |
| PE(39:4)          | 19:0/20:4                              | 782.55>641.55                               |
| PE(39:3)          | 19:0/20:3                              | 784.60>643.60                               |
| PC(29:0)          | 14:0/15:0                              | 692.50>184.10                               |
| PC(31:1)          | 13:0/18:1                              | 718.55>184.10                               |
| PC(31:0)          | 13:0/18:0                              | 720.55>184.10                               |
| PC(33:2)          | 15:0/18:2                              | 744.55>184.10                               |
| PC(33:1)          | 15:0/18:1                              | 746.55>184.10                               |
| PC(33:0)          | 15:0/18:0                              | 748.60>184.10                               |
| PC(P-35:2)        | P-17:0/18:2                            | 756.60>184.10                               |
| PC(P-35:1)        | P-17:0/18:1                            | 758.60>184.10                               |
| PC(35:2)          | 17:0/18:2                              | 772.60>184.10                               |
| PC(35:1)          | 17:0/18:1                              | 774.60>184.10                               |
| PC(37:3)          | 19:0/18:3                              | 798.60>184.10                               |
| PC(37:2)          | 19:0/18:2                              | 800.60>184.10                               |
| PC(37:1)          | 19:0/18:1                              | 802.65>184.10                               |
| PC(39:5)          | 19:0/20:5                              | 822.60>184.10                               |

|             |            |               |
|-------------|------------|---------------|
| PC(39:4)    | 19:0/20:4  | 824.60>184.10 |
| PC(39:3)    | 19:0/20:3  | 826.65>184.10 |
| LPE(17:0)   | 17:0       | 468.30>327.30 |
| LPE(19:0)   | 19:0       | 496.35>355.35 |
| LPE(P-17:0) | P-17:0     | 452.30>311.30 |
| LPE(P-19:0) | P-19:0     | 480.35>339.35 |
| PS(33:1)    | 15:0/18:1  | 748.50>563.50 |
| PS(35:2)    | 17:0/18:2  | 774.55>589.50 |
| PS(37:3)    | 19:0/18:3  | 800.55>615.55 |
| PS(37:2)    | 19:0/18:2  | 802.55>617.55 |
| PS(39:5)    | 19:0/20:5  | 824.55>639.55 |
| PS(39:4)    | 19:0/20:4  | 826.55>641.55 |
| PS(39:3)    | 19:0/20:3  | 828.60>643.55 |
| SM(d33:1)   | d18:1/15:0 | 689.55>184.10 |
| SM(d35:1)   | d18:1/17:0 | 717.60>184.10 |
| SM(d37:1)   | d18:0/19:0 | 745.60>184.10 |
| SM(d39:2)   | d18:2/21:0 | 771.65>184.10 |
| SM(t38:2)   | d18:1/21:0 | 773.60>184.10 |
| SM(d39:0)   | d18:0/21:0 | 775.65>184.10 |
| SM(d41:2)   | d18:2/23:0 | 799.65>184.10 |
| SM(d41:1)   | d18:1/23:0 | 801.70>184.10 |
| SM(d41:0)   | d18:0/23:0 | 803.70>184.10 |
| LPC(P-17:0) | P-17:0     | 494.35>184.10 |
| LPC(P-19:0) | P-19:0     | 522.40>184.10 |

**Supplemental Table 3** List of OCFAs-containing phospholipid identified in human milk

| TAG      | Composition       | [M+NH <sub>4</sub> ] <sup>+</sup> | [M+H-FA] <sup>+</sup> |
|----------|-------------------|-----------------------------------|-----------------------|
| O-Ha-P   | C18:1/C17:0/C16:0 | 864.8044                          | 577.5158              |
| O-O-Pa   | C18:1/C18:1/C15:0 | 862.7899                          | 603.5872              |
| O-L-Pa   | C18:1/C18:2/C15:0 | 860.7766                          | 601.5839              |
| L-He-P   | C18:2/C17:1/C16:0 | 860.7766                          | 575.5540              |
| He-He-He | C17:1/C17:1/C17:1 | 860.7766                          | 575.5540              |
| O-O-Ha   | C18:1/C18:1/C17:0 | 890.8212                          | 603.5801              |
| O-L-Ha   | C18:1/C18:2/C17:0 | 888.8063                          | 601.5718              |
| O-Ln-Ha  | C18:1/C18:3/C17:0 | 886.7872                          | 599.5709              |

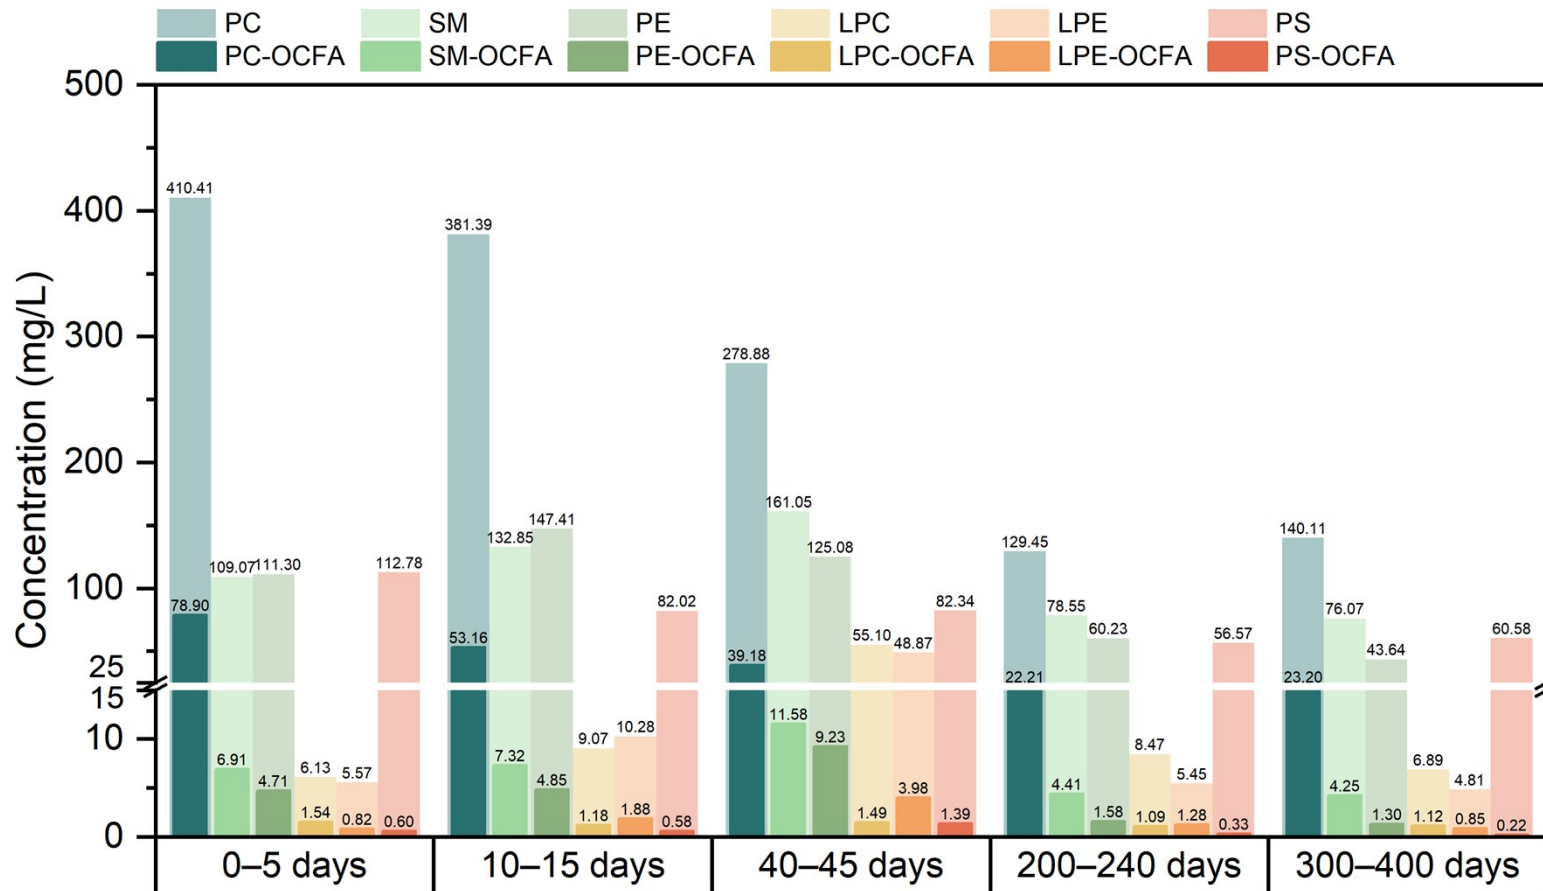

**Supplemental Figure 1** The concentration of sub-class PLs and PL-OCFA across lactation periods. Values were expressed as mean. Abbreviation: PL-OCFA, odd chain fatty acid-containing phospholipids; PLs, phospholipids; PC-OCFA, odd chain fatty acid-containing phosphatidylcholines;

PC, phosphatidylcholines; SM-OCFA, odd chain fatty acid-containing sphingomyelins; SM, sphingomyelins; PE-OCFA, odd chain fatty acid-containing phosphatidylethanolamines; PE, phosphatidylethanolamines; LPC-OCFA, odd chain fatty acid-containing lysophosphatidylcholines; LPC, lysophosphatidylcholines; LPE-OCFA, odd chain fatty acid-containing lysophosphatidylethanolamines; LPE, lysophosphatidylethanolamines; PS-OCFA, odd chain fatty acid-containing phosphatidylserines; PS, phosphatidylserines.
